# Supplementary material for: Jasmonic Acid, Not Salicyclic Acid Restricts Endophytic Root Colonization of Rice
Source: PubMed Central journal article supplement (PMC7000620; doi:10.3389/fpls.2019.01758), 2020-01-29
Supplement: DataSheet_2.pdf [file DataSheet_2.pdf]

**Table S1. Primer sequences applied in real-time PCR.**

| <b>Locus Number</b> | <b>Description</b>                                   | <b>Primer-Forward</b>    | <b>Primer-Reverse</b>    |
|---------------------|------------------------------------------------------|--------------------------|--------------------------|
| <b>Os09g0361500</b> | OsICS1                                               | TGTCCCCACAAAGGCATCCTGG   | TGGCCCTCAACCTTTAAACATGCC |
| <b>Os05g0322900</b> | OsWRKY45                                             | GAATCATGGATGGACACGGG     | AGACCCCAGCTCATAATCA      |
| <b>Os05t0586200</b> | OsJAR1                                               | GATCCCAGCACTGTGGCCAA     | CCGATGCGCCATAGTCAGCA     |
| <b>Os11g0684000</b> | OsJAmyb                                              | GGACCTCACCTCATCAATTA     | TGCTATCTTGGACCATCGGT     |
| <b>Os04g0578000</b> | OsACS2                                               | TGCGCCTTACTACGTCGACTACAT | ACGCTAACGCACGTCTCTACAA   |
| <b>Os08g0203400</b> | SHR5                                                 | ATCTCTTTGAGTGGGCTTGG     | CTGCTGAGCTTAGGGGTAGT     |
| <b>Os03g0645900</b> | OsNCED3                                              | CTACATCCTGTCCTTCGTCCAC   | AGAAACGTGGAGGTGTTCCGAT   |
| <b>Os03g0285800</b> | OsMAPK5                                              | GGGATCGTCTGCTCCGTGATGA   | ATGTTCTCGTGGTTCGAGGTGCC  |
| <b>Os02g0587800</b> | Virulence factor, pectin lyase fold family protein   | CGATGACGACCCTATTGGCTA    | CAGTCCGCTCTATCGCTCTT     |
| <b>Os03g0667100</b> | OsNPR3                                               | CGCTCCTCGTTTCAACAGCTC    | TTGGTGCATTGACAGAGTGCCA   |
| <b>Os05g0368000</b> | RH1                                                  | CTCGTTGGAATTGGTCCTTCGG   | CTGGCACATGGATTGCGTGA     |
| <b>Os06g0317200</b> | Similar to glycine-rich cell wall structural protein | AGGCTAGCAAGCTCGACTGA     | TCCCCTCAGATTCCTGGCTTC    |
| <b>Os06g0592500</b> | responsive transcriptional coactivator               | TTAGGCGTTGATCCGTTTGTGAAT | GCCATCATCACTTCACATGCGTC  |
| <b>Os06g0695300</b> | prx92                                                | GACTCCGTCTTCCTGAGTGG     | GAGGCAGGTTGACGCTGTTC     |
| <b>Os08g0535200</b> | Xa13, OsSWEET11                                      | CCAGTAGCAATGGCAGGAGGT    | AACGTCGCCACTGGTGCAA      |
| <b>Os09g0483300</b> | calcium-binding EF hand family protein               | GGAGCAGCTGCCTAACTGAAC    | ACACCGTGTATCCTTCCGTGTAT  |
| <b>Os11g0242800</b> | ASCAB9-A, PSII CP26, PSII Lhcb5                      | CCGGGAAGAAGAAGGGAGGA     | TCTCAGCCACAAATCCAAACACT  |
| <b>Os01g0194300</b> | OsNPR1                                               | GTTTCATGGCGCAGGTCCTCT    | GCCTCGCAGCAATGTGAAGA     |

Chen, X., Miché, L., Sachs, S., Wang, Q., Buschart, A., Yang, H., et al. (2015). Rice responds to endophytic colonization which is independent of the common symbiotic signaling pathway. *New Phytol.* 208, 531–543.
